# Supplementary material for: The role of childhood trauma in cognitive performance in schizophrenia and bipolar disorder – A systematic review
Source: PubMed Central journal article supplement — Schizophr Res Cogn. 2018 Dec 11;16:1–11. doi: 10.1016/j.scog.2018.11.001 (PMC6293032; doi:10.1016/j.scog.2018.11.001), 2018-12-11
Supplement: mmc1.pdf [file mmc1.pdf]

# **The role of childhood trauma in cognitive performance in schizophrenia and bipolar disorder – A systematic review**

**Running title:** Childhood trauma and cognition in psychosis

**Maria R Dauvermann<sup>a\*</sup>, Gary Donohoe<sup>a</sup>**

<sup>a</sup> School of Psychology, National University of Ireland Galway, University Road, Galway, Ireland

\*Corresponding author:

Dr Maria Dauvermann

School of Psychology

National University of Ireland Galway

University Road, Galway, Ireland

maria.dauvermann@nuigalway.ie

Tel. +353 91 495 953

Prof Gary Donohoe

School of Psychology

National University of Ireland Galway

University Road, Galway, Ireland

gary.donohoe@nuigalway.ie

Tel. +353 91 495 122

| Study                                                                 | Participants<br>(Patients /<br>Healthy<br>participants)<br><i>N</i> | Stress<br>questionnaire  | Stressful events<br>(Patients / Healthy<br>participants)                                                                                                                                            | Stress severity<br>(Patients / Healthy<br>participants)<br>Mean / SD                                                                                                                                                                                                                                   | Stress frequency<br>(Patients / Healthy<br>participants)<br>Percentage or <i>N</i> | Combination of CT<br>frequency and severity<br>(Patients / Healthy<br>participants)<br>Percentage or <i>N</i>                                                                                                                                                                                                                                                  |
|-----------------------------------------------------------------------|---------------------------------------------------------------------|--------------------------|-----------------------------------------------------------------------------------------------------------------------------------------------------------------------------------------------------|--------------------------------------------------------------------------------------------------------------------------------------------------------------------------------------------------------------------------------------------------------------------------------------------------------|------------------------------------------------------------------------------------|----------------------------------------------------------------------------------------------------------------------------------------------------------------------------------------------------------------------------------------------------------------------------------------------------------------------------------------------------------------|
| <b>Patients at ultra-high risk of psychosis</b>                       |                                                                     |                          |                                                                                                                                                                                                     |                                                                                                                                                                                                                                                                                                        |                                                                                    |                                                                                                                                                                                                                                                                                                                                                                |
| Ucok et al., 2015                                                     | UHR = 53                                                            | CTQ (28-item<br>version) | <ul style="list-style-type: none"> <li>• Total CTQ</li> <li>• Physical abuse</li> <li>• Emotional abuse</li> <li>• Sexual abuse</li> <li>• Emotional neglect</li> <li>• Physical neglect</li> </ul> | <ul style="list-style-type: none"> <li>• Total CTQ =<br/>40.4 ± 12.6</li> <li>• Physical abuse =<br/>6.4 ± 2.8</li> <li>• Emotional abuse = 9.5 ±<br/>4.5</li> <li>• Sexual abuse =<br/>5.8 ± 3.0</li> <li>• Emotional neglect =<br/>14.7 ± 5.0</li> <li>• Physical neglect = 4.1 ±<br/>1.5</li> </ul> | <ul style="list-style-type: none"> <li>• Not reported</li> </ul>                   | <ul style="list-style-type: none"> <li>• Dichotomisation into low<br/>and high CT levels</li> <li>• High CT levels:</li> <li>• Physical abuse = 41.5%</li> <li>• Emotional abuse = 57.7%</li> <li>• Sexual abuse = 24.4%</li> <li>• Emotional neglect = 59.6%</li> <li>• Physical neglect = 0%</li> </ul>                                                      |
| <b>Patients with first-episode psychosis and healthy participants</b> |                                                                     |                          |                                                                                                                                                                                                     |                                                                                                                                                                                                                                                                                                        |                                                                                    |                                                                                                                                                                                                                                                                                                                                                                |
| Aas et al., 2012a                                                     | FEP = 83<br>HP = 63                                                 | CECA-Q                   | <ul style="list-style-type: none"> <li>• Either parent died</li> <li>• Separation from<br/>either parent</li> <li>• Physical abuse</li> <li>• Sexual abuse</li> </ul>                               | <ul style="list-style-type: none"> <li>• Not reported</li> </ul>                                                                                                                                                                                                                                       | <ul style="list-style-type: none"> <li>• Not reported</li> </ul>                   | <ul style="list-style-type: none"> <li>• Dichotomisation into<br/>absent/non-severe and<br/>severe CT levels</li> </ul>                                                                                                                                                                                                                                        |
| Aas et al., 2011                                                      | FEP = 138<br>HP = 138                                               | CECA-Q                   | <ul style="list-style-type: none"> <li>• Either parent died</li> <li>• Separation from<br/>either parent</li> <li>• Physical abuse</li> <li>• Sexual abuse</li> </ul>                               | <ul style="list-style-type: none"> <li>• Not reported</li> </ul>                                                                                                                                                                                                                                       | <ul style="list-style-type: none"> <li>• Not reported</li> </ul>                   | <ul style="list-style-type: none"> <li>• Dichotomisation into<br/>absent/non-severe and<br/>severe CT levels</li> <li>• Either parent died = 9%<br/>(FEP) versus 8% (HP)</li> <li>• Separation from either<br/>parent = 50% (FEP) versus<br/>31% (HP)</li> <li>• Physical abuse = 24% (FEP)<br/>versus 13% (HP)</li> <li>• Sexual abuse = 16% (FEP)</li> </ul> |

---

versus 8% (HP)

---

Supplementary Table 1. Childhood trauma assessment and analysis - Patients at ultra-high of psychosis, patients with first-episode psychosis and healthy participants

Abbreviations: CECA-Q, Childhood Experience of Care Abuse Questionnaire; CTQ, Childhood Trauma Questionnaire; CT, Early-life stress; FEP, patients with first-episode psychosis; HP, healthy participants; UHR, Ultra – high risk subjects of schizophrenia.

| <b>Study</b>                | <b>Participants<br/>(Patients /<br/>Healthy<br/>participants)<br/>N</b> | <b>Stress<br/>questionnaire</b> | <b>Stressful events<br/>(Patients / Healthy<br/>participants)</b>                                                                                                                                   | <b>Stress severity<br/>(Patients / Healthy<br/>participants)<br/>Mean / SD</b>                                             | <b>Stress frequency<br/>(Patients / Healthy<br/>participants)<br/>Percentage</b> | <b>Combination of CT<br/>frequency and severity<br/>(Patients / Healthy<br/>participants)<br/>Percentage or N</b>                                                                                                                                                                                                                                                                                                                |
|-----------------------------|-------------------------------------------------------------------------|---------------------------------|-----------------------------------------------------------------------------------------------------------------------------------------------------------------------------------------------------|----------------------------------------------------------------------------------------------------------------------------|----------------------------------------------------------------------------------|----------------------------------------------------------------------------------------------------------------------------------------------------------------------------------------------------------------------------------------------------------------------------------------------------------------------------------------------------------------------------------------------------------------------------------|
| <b>Poletti et al., 2017</b> | BD = 76<br>HP = 90                                                      | RFQ                             | <ul style="list-style-type: none"> <li>• Harsh parenting</li> <li>• Overt family conflict</li> </ul>                                                                                                | <ul style="list-style-type: none"> <li>• Total Score:</li> <li>• BD = 27.15 ± 8.87</li> <li>• HP = 24.20 ± 6.33</li> </ul> | <ul style="list-style-type: none"> <li>• Not reported</li> </ul>                 | <ul style="list-style-type: none"> <li>• Dichotomisation of low and high scores</li> </ul>                                                                                                                                                                                                                                                                                                                                       |
| <b>Bucker et al., 2013</b>  | BP = 64<br>HP = 28                                                      | CTQ (28 –<br>item version)      | <ul style="list-style-type: none"> <li>• Total CTQ</li> <li>• Physical abuse</li> <li>• Emotional abuse</li> <li>• Sexual abuse</li> <li>• Emotional neglect</li> <li>• Physical neglect</li> </ul> | <ul style="list-style-type: none"> <li>• Not reported</li> </ul>                                                           | <ul style="list-style-type: none"> <li>• Not reported</li> </ul>                 | <ul style="list-style-type: none"> <li>• Dichotomisation into absent and high CT levels</li> <li>• High levels:</li> <li>• BP with trauma = 40.6%</li> <li>• HP with trauma = 32.1%</li> </ul>                                                                                                                                                                                                                                   |
| <b>Aas et al., 2012b</b>    | SZ = 174<br>BP = 167                                                    | CTQ (28-item<br>version)        | <ul style="list-style-type: none"> <li>• Total CTQ</li> <li>• Physical abuse</li> <li>• Emotional abuse</li> <li>• Sexual abuse</li> <li>• Emotional neglect</li> <li>• Physical neglect</li> </ul> | <ul style="list-style-type: none"> <li>• Not reported</li> </ul>                                                           | <ul style="list-style-type: none"> <li>• Not reported</li> </ul>                 | <ul style="list-style-type: none"> <li>• Dichotomisation into low and high CT levels</li> <li>• High CT levels:</li> <li>• Physical abuse = 15.6%</li> <li>• Emotional abuse = 34.2%</li> <li>• Sexual abuse = 21.6%</li> <li>• Emotional neglect = 9.3%</li> <li>• Physical neglect = 46.4%</li> <li>• Total score - low levels (below median) = 54.19%</li> <li>• Total score - high levels (above median) = 45.07%</li> </ul> |

|                                          |                                                               |                         |                                                                                                                                                                                                     |                                                                                                                                                                                                                                                                                                                                                                                                                                                                                                                                                                                                                                                                   |                |                                                                                                                                                                                                                                                                                                                         |
|------------------------------------------|---------------------------------------------------------------|-------------------------|-----------------------------------------------------------------------------------------------------------------------------------------------------------------------------------------------------|-------------------------------------------------------------------------------------------------------------------------------------------------------------------------------------------------------------------------------------------------------------------------------------------------------------------------------------------------------------------------------------------------------------------------------------------------------------------------------------------------------------------------------------------------------------------------------------------------------------------------------------------------------------------|----------------|-------------------------------------------------------------------------------------------------------------------------------------------------------------------------------------------------------------------------------------------------------------------------------------------------------------------------|
| <b>Marshall et al., 2016</b>             | BP = 233<br>HP = 90                                           | CTQ (28 – item version) | <ul style="list-style-type: none"> <li>• Total CTQ</li> <li>• Physical abuse</li> <li>• Emotional abuse</li> <li>• Sexual abuse</li> <li>• Emotional neglect</li> <li>• Physical neglect</li> </ul> | <ul style="list-style-type: none"> <li>• Total CTQ = <math>60.30 \pm 12.50</math> (BP) versus <math>52.00 \pm 8.20</math> (HP)</li> <li>• Physical abuse = <math>15.60 \pm 4.80</math> (BP) versus <math>12.80 \pm 4.10</math> (HP)</li> <li>• Emotional abuse = <math>8.90 \pm 4.00</math> (BP) versus <math>8.80 \pm 3.30</math> (HP)</li> <li>• Sexual abuse = <math>10.90 \pm 6.70</math> (BP) versus <math>7.60 \pm 4.10</math> (HP)</li> <li>• Emotional neglect = <math>15.60 \pm 4.60</math> (BP) versus <math>13.50 \pm 4.00</math> (HP)</li> <li>• Physical neglect = <math>7.70 \pm 1.60</math> (BP) versus <math>9.10 \pm 1.90</math> (HP)</li> </ul> | • Not reported | • Not reported                                                                                                                                                                                                                                                                                                          |
| <b>van Os et al., 2017</b>               | PSY = 1119<br>Siblings of PSY <sup>a</sup> = 1059<br>HP = 586 | CTQ (25-item version)   | <ul style="list-style-type: none"> <li>• Total CTQ</li> <li>• Physical abuse</li> <li>• Emotional abuse</li> <li>• Sexual abuse</li> <li>• Emotional neglect</li> <li>• Physical neglect</li> </ul> | • Not reported                                                                                                                                                                                                                                                                                                                                                                                                                                                                                                                                                                                                                                                    | • Not reported | <ul style="list-style-type: none"> <li>• Continuous variable</li> <li>• Dichotomous variable of absent and existent CT exposure at baseline.</li> <li>• Total scores for existent levels: <ul style="list-style-type: none"> <li>• PSY = 27.3%</li> <li>• Siblings = 18.6%</li> <li>• HP = 15.4%</li> </ul> </li> </ul> |
| <b>Mansueto et al., 2017<sup>b</sup></b> | PSY = 532                                                     | CTQ (25-item version)   | <ul style="list-style-type: none"> <li>• Total CTQ</li> <li>• Physical abuse</li> <li>• Emotional abuse</li> <li>• Sexual abuse</li> <li>• Emotional neglect</li> <li>• Physical neglect</li> </ul> | • Total CTQ = $1.62 (\pm 0.51)$                                                                                                                                                                                                                                                                                                                                                                                                                                                                                                                                                                                                                                   | • Not reported | <ul style="list-style-type: none"> <li>• Dichotomisation into non-severe or severe CT levels</li> <li>• Non-severe CT levels 429</li> <li>• Severe CT levels = 103</li> </ul>                                                                                                                                           |

|                           |                      |                       |                                                                                                                                                                                                                                                               |                                                                                                                              |                                                                  |                                                                                                                                                                                                                                                                                                                                                                                                                                                                                                                      |
|---------------------------|----------------------|-----------------------|---------------------------------------------------------------------------------------------------------------------------------------------------------------------------------------------------------------------------------------------------------------|------------------------------------------------------------------------------------------------------------------------------|------------------------------------------------------------------|----------------------------------------------------------------------------------------------------------------------------------------------------------------------------------------------------------------------------------------------------------------------------------------------------------------------------------------------------------------------------------------------------------------------------------------------------------------------------------------------------------------------|
| <b>Green et al., 2015</b> | SZ = 617<br>HP = 659 | CAQ (20-item version) | <ul style="list-style-type: none"> <li>• Total score</li> <li>• Physical abuse</li> <li>• Emotional abuse</li> <li>• Sexual abuse</li> <li>• Emotional neglect</li> <li>• Physical neglect</li> <li>• Any CAQ exposure</li> <li>• Abuse or neglect</li> </ul> | <ul style="list-style-type: none"> <li>• Not reported for all participants</li> </ul>                                        | <ul style="list-style-type: none"> <li>• Not reported</li> </ul> | <ul style="list-style-type: none"> <li>• Dichotomisation into absent or existent CT levels</li> <li>• Existent CT levels:</li> <li>• Physical abuse = 27.5% (SZ) – 13.6% (HP)</li> <li>• Emotional abuse = 44.7% (SZ) – 20.4% (HP)</li> <li>• Sexual abuse = 7.3% (SZ) – 1.2% (HP)</li> <li>• Emotional neglect = 55.3% (SZ) – 26% (HP)</li> <li>• Physical neglect = 25.3% (SZ) – 17.2% (HP)</li> <li>• Any CAQ exposure = 93.1% (SZ) – 74.5% (HP)</li> <li>• Abuse or neglect = 69.4% (SZ) – 44.2% (HP)</li> </ul> |
| <b>Green et al., 2014</b> | SZ = 617<br>HP = 659 | CAQ (20-item version) | <ul style="list-style-type: none"> <li>• Total score</li> <li>• Physical abuse</li> <li>• Emotional abuse</li> <li>• Sexual abuse</li> <li>• Emotional neglect</li> <li>• Loss</li> <li>• Family dysfunction</li> <li>• Financial difficulties</li> </ul>     | <ul style="list-style-type: none"> <li>• Total CAQ score:</li> <li>• SZ = 6.25 ± 4.87</li> <li>• HP = 2.85 ± 3.19</li> </ul> | <ul style="list-style-type: none"> <li>• Not reported</li> </ul> | <ul style="list-style-type: none"> <li>• Dichotomisation into absent or existent CT levels</li> <li>• Physical abuse = 20.26% (SZ) – 10.32% HP</li> <li>• Emotional abuse = 32.90% (SZ) – 15.48% (HP)</li> <li>• Sexual abuse = 5.35% (SZ) – 0.91% (HP)</li> <li>• Emotional neglect = 40.68% (SZ) – 20.91% (HP)</li> <li>• Loss = 40.68% (SZ) – 31.11% (HP)</li> <li>• Family dysfunction =</li> </ul>                                                                                                              |

|                            |                      |                       |                                                                                                                                                                                                                                                    |                                                                                                                                                                                                                                                                                                                                                     |                |                                                                                                                                                                                                                                                                                                                                                                                                         |
|----------------------------|----------------------|-----------------------|----------------------------------------------------------------------------------------------------------------------------------------------------------------------------------------------------------------------------------------------------|-----------------------------------------------------------------------------------------------------------------------------------------------------------------------------------------------------------------------------------------------------------------------------------------------------------------------------------------------------|----------------|---------------------------------------------------------------------------------------------------------------------------------------------------------------------------------------------------------------------------------------------------------------------------------------------------------------------------------------------------------------------------------------------------------|
|                            |                      |                       |                                                                                                                                                                                                                                                    |                                                                                                                                                                                                                                                                                                                                                     |                | 66.29% (SZ) – 54.02% (HP)                                                                                                                                                                                                                                                                                                                                                                               |
|                            |                      |                       |                                                                                                                                                                                                                                                    |                                                                                                                                                                                                                                                                                                                                                     |                | • Financial difficulties = 18.6% (SZ) – 13.05% (HP)                                                                                                                                                                                                                                                                                                                                                     |
| <b>McCabe et al., 2012</b> | SZ = 408<br>HP = 267 | CAQ (20 item version) | <ul style="list-style-type: none"> <li>• Five factors of stress types</li> <li>• Abusive Parenting</li> <li>• Loss, Poverty and Sexual Abuse</li> <li>• Neglectful Parenting</li> <li>• Dysfunctional Parenting</li> <li>• Sibling Loss</li> </ul> | • Not reported                                                                                                                                                                                                                                                                                                                                      | • Not reported | <ul style="list-style-type: none"> <li>• Dichotomisation into absent or existent CT levels</li> <li>• Abusive Parenting = 63.3% (SZ) – 40.9% (HP)</li> <li>• Loss, Poverty and Sexual Abuse = 45.6% (SZ) – 35.5% (HP)</li> <li>• Neglectful Parenting = 51.0% (SZ) – 23.3% (HP)</li> <li>• Dysfunctional Parenting = 68.9% (SZ) – 34.6% (HP)</li> <li>• Sibling Loss = 5.3% (SZ) – 4.4% (HP)</li> </ul> |
| <b>Ruby et al., 2017</b>   | SZ = 28              | ETI                   | <ul style="list-style-type: none"> <li>• General events</li> <li>• Physical abuse events</li> <li>• Emotional abuse events</li> <li>• Sexual abuse events</li> <li>• Sum of all events</li> <li>• Negative rating of all events</li> </ul>         | <ul style="list-style-type: none"> <li>• General events = 4.7 (<math>\pm 2.8</math>)</li> <li>• Physical abuse events = 2.2 (<math>\pm 1.8</math>)</li> <li>• Emotional abuse events = 2.7 (<math>\pm 2.7</math>)</li> <li>• Sexual abuse events = .88 (<math>\pm 1.8</math>)</li> <li>• Sum of all events = 10.4 (<math>\pm 6.8</math>)</li> </ul> | • Not reported | • Not reported                                                                                                                                                                                                                                                                                                                                                                                          |
| <b>Li et al., 2017</b>     | SZ = 162             | CTQ (28-item version) | <ul style="list-style-type: none"> <li>• Physical abuse</li> <li>• Emotional abuse</li> <li>• Sexual abuse</li> <li>• Emotional neglect</li> <li>• Physical neglect</li> </ul>                                                                     | • Not reported                                                                                                                                                                                                                                                                                                                                      | • Not reported | <ul style="list-style-type: none"> <li>• Physical abuse = 26.5%</li> <li>• Emotional abuse = 21.2%</li> <li>• Sexual abuse = 35.8%</li> <li>• Emotional neglect = 55.8%</li> </ul>                                                                                                                                                                                                                      |

|                             |         |                       |                                                                                                                                                                                                     |                |                |                                                                                                                                                                                                                                                                                                                                                                                                                                                                                                                                                   |
|-----------------------------|---------|-----------------------|-----------------------------------------------------------------------------------------------------------------------------------------------------------------------------------------------------|----------------|----------------|---------------------------------------------------------------------------------------------------------------------------------------------------------------------------------------------------------------------------------------------------------------------------------------------------------------------------------------------------------------------------------------------------------------------------------------------------------------------------------------------------------------------------------------------------|
| <b>Kelly et al., 2016</b>   | SZ = 80 | CTQ (28-item version) | <ul style="list-style-type: none"> <li>• Total CTQ</li> <li>• Focus on physical abuse</li> </ul>                                                                                                    | • Not reported | • Not reported | <ul style="list-style-type: none"> <li>• Physical neglect = 66.5%</li> <li>• Dichotomisation into absent and high CT levels</li> <li>• High CT levels:</li> <li>• Females with PA = 12.5%</li> <li>• Females w/o PA = 17.5%</li> <li>• Males with PA = 13.75%</li> <li>• Males w/o PA = 56.25%</li> </ul>                                                                                                                                                                                                                                         |
| <b>Shannon et al., 2011</b> | SZ = 85 | CTQ (28-item version) | <ul style="list-style-type: none"> <li>• Total CTQ</li> <li>• Physical abuse</li> <li>• Emotional abuse</li> <li>• Sexual abuse</li> <li>• Emotional neglect</li> <li>• Physical neglect</li> </ul> | • Not reported | • Not reported | <ul style="list-style-type: none"> <li>• Dichotomisation into absent/low versus moderate/high CT levels of total CTQ score:</li> <li>• High CT levels = 45%</li> <li>• High CT levels for different CT events:</li> <li>• Physical abuse = 10.6%</li> <li>• Emotional abuse = 14.1% (PSY)</li> <li>• Sexual abuse = 17.6%</li> <li>• Emotional neglect = 18.8%</li> <li>• Physical neglect = 16.4%</li> <li>• High CT levels:</li> <li>• 29.4% high CT levels for one CT event</li> <li>• 15.3% high levels for two or more categories</li> </ul> |



|                              |         |                              |                                                                                                                                                                |                                                                                                                                                                                     |                                                                  |                                                                                                                                                                                                                                                                                                                                                                                                                                                                                                                                                                                                                                                                                                               |
|------------------------------|---------|------------------------------|----------------------------------------------------------------------------------------------------------------------------------------------------------------|-------------------------------------------------------------------------------------------------------------------------------------------------------------------------------------|------------------------------------------------------------------|---------------------------------------------------------------------------------------------------------------------------------------------------------------------------------------------------------------------------------------------------------------------------------------------------------------------------------------------------------------------------------------------------------------------------------------------------------------------------------------------------------------------------------------------------------------------------------------------------------------------------------------------------------------------------------------------------------------|
| <b>Schenkel et al., 2005</b> | SZ = 40 | Medical charts and interview | <ul style="list-style-type: none"> <li>• History of childhood abuse or neglect</li> <li>• Physical abuse</li> <li>• Sexual abuse</li> <li>• Neglect</li> </ul> | <ul style="list-style-type: none"> <li>• Low severity of CT events = 12.5%</li> <li>• Moderate severity of CT events = 50%</li> <li>• High severity of CT events = 37.5%</li> </ul> | <ul style="list-style-type: none"> <li>• Not reported</li> </ul> | <ul style="list-style-type: none"> <li>• Dichotomisation into absent or existent CT levels</li> <li>• Any experience of physical abuse, sexual abuse and/or neglect = 45%</li> <li>• Physical abuse = 15%</li> <li>• Sexual abuse = 10%</li> <li>• Neglect and physical abuse = 2.5%</li> <li>• Neglect and sexual abuse = 2.5%</li> <li>• Physical and sexual abuse = 10%</li> <li>• Physical abuse, sexual abuse and neglect = 5%</li> <li>• Moderate frequency of at least 2 events = 62.5%</li> <li>• Severe frequency of at least 2 events = 37.5%</li> <li>• Low severity of CT events = 12.5%</li> <li>• Moderate severity of CT events = 50%</li> <li>• High severity of CT events = 37.5%</li> </ul> |
| <b>Lysaker et al., 2002</b>  | SZ = 36 | CAQ                          | <ul style="list-style-type: none"> <li>• Physical abuse</li> </ul>                                                                                             | <ul style="list-style-type: none"> <li>• 20.0 (<math>\pm</math> 5.3)</li> </ul>                                                                                                     | <ul style="list-style-type: none"> <li>• Not reported</li> </ul> | <ul style="list-style-type: none"> <li>• Not reported</li> </ul>                                                                                                                                                                                                                                                                                                                                                                                                                                                                                                                                                                                                                                              |

Supplementary Table 2. Childhood trauma assessment and analysis - Patients with established bipolar disorder, schizophrenia, psychosis and healthy participants.

<sup>a</sup> No psychiatric diagnosis

<sup>b</sup> Only baseline data reported

Abbreviations: BD, patients with bipolar disorder; CATS, The Child Abuse and Trauma Scale; CAQ, Childhood Adversity Questionnaire; CTQ, Childhood Trauma Questionnaire; CT, Early-life stress; ETI, Early Trauma Inventory; HP, healthy participants; PSY, patients with psychosis; RFQ, Risky Families Questionnaire; SZ, Patients with schizophrenia.

| Study                                                                                                                                                       | Participants<br>(Patients /<br>Healthy<br>participants)<br>N | Stress<br>questionnaire | Stressful events<br>(Patients / Healthy<br>participants)                                                                                                                                                                                                                                                                                                                                           | Stress severity<br>(Patients / Healthy<br>participants)<br>Mean / SD                                                                                                            | Stress frequency<br>(Patients / Healthy<br>participants)<br>Percentage | Combination of CT frequency<br>and severity<br>(Patients / Healthy<br>participants)<br>Percentage, N, or Mean / SD                                                                                                           |
|-------------------------------------------------------------------------------------------------------------------------------------------------------------|--------------------------------------------------------------|-------------------------|----------------------------------------------------------------------------------------------------------------------------------------------------------------------------------------------------------------------------------------------------------------------------------------------------------------------------------------------------------------------------------------------------|---------------------------------------------------------------------------------------------------------------------------------------------------------------------------------|------------------------------------------------------------------------|------------------------------------------------------------------------------------------------------------------------------------------------------------------------------------------------------------------------------|
| <b>Patients at ultra-high risk of psychosis, patients with first episode of psychosis, patients with established schizophrenia and healthy participants</b> |                                                              |                         |                                                                                                                                                                                                                                                                                                                                                                                                    |                                                                                                                                                                                 |                                                                        |                                                                                                                                                                                                                              |
| <b>Schalinski et al.,<br/>2017</b>                                                                                                                          | PSY = 168<br>(SZ = 134)<br>HP = 50                           | MACE                    | <ul style="list-style-type: none"> <li>• Physical abuse</li> <li>• Verbal abuse</li> <li>• Non-verbal emotional abuse</li> <li>• Witnessing interparental abuse</li> <li>• Abuse of siblings</li> <li>• Peer-related verbal abuse</li> <li>• Physical bullying</li> <li>• Intra-, extra-familial and peer-related sexual abuse</li> <li>• Emotional neglect</li> <li>• Physical neglect</li> </ul> | <ul style="list-style-type: none"> <li>• PSY = 29.1 (15.4)</li> <li>• HP = 13.7 (8.6)</li> </ul>                                                                                | <ul style="list-style-type: none"> <li>• Not reported</li> </ul>       | <ul style="list-style-type: none"> <li>• Duration in years:</li> <li>• PSY = 6.8 (6.3)</li> <li>• HP = 1.7 (2.8)</li> <li>• Participants with multiplicity:</li> <li>• PSY = 140 (83.3%)</li> <li>• HP = 22 (44%)</li> </ul> |
| <b>Palmier-Claus et al., 2016</b>                                                                                                                           | UHR = 14<br>FEP = 20<br>SZ = 20<br>HP = 120                  | CTQ (28-item version)   | <ul style="list-style-type: none"> <li>• Total CTQ</li> <li>• Physical abuse</li> <li>• Emotional abuse</li> <li>• Sexual abuse</li> <li>• Emotional neglect</li> <li>• Physical neglect</li> </ul>                                                                                                                                                                                                | <ul style="list-style-type: none"> <li>• Total CTQ:</li> <li>• 45.8 ± 16.2 (UHR)</li> <li>• 39.9 ± 12.3 (FEP)</li> <li>• 45.1 ± 15.5 (SZ)</li> <li>• 31.2 ± 7.5 (HP)</li> </ul> | <ul style="list-style-type: none"> <li>• Not reported</li> </ul>       | <ul style="list-style-type: none"> <li>• Not reported</li> </ul>                                                                                                                                                             |
| <b>Garcia et al., 2016</b>                                                                                                                                  | FEP = 79<br>HP = 58                                          | CTQ (28-item version)   | <ul style="list-style-type: none"> <li>• Total CTQ</li> <li>• Physical abuse</li> <li>• Emotional abuse</li> <li>• Sexual abuse</li> <li>• Emotional neglect</li> <li>• Physical neglect</li> </ul>                                                                                                                                                                                                | <ul style="list-style-type: none"> <li>• Not reported</li> </ul>                                                                                                                | <ul style="list-style-type: none"> <li>• Not reported</li> </ul>       | <ul style="list-style-type: none"> <li>• Not reported</li> </ul>                                                                                                                                                             |

Supplementary Table 3. Childhood trauma and social cognitive function in patients at ultra-high risk of psychosis, patients with first episode of psychosis, patients with established schizophrenia and healthy participants

Abbreviations: CTQ, Childhood Trauma Questionnaire; CT, Early-life stress; HP, healthy participants; MACE Scale, Maltreatment and Abuse Chronology of Exposure.
